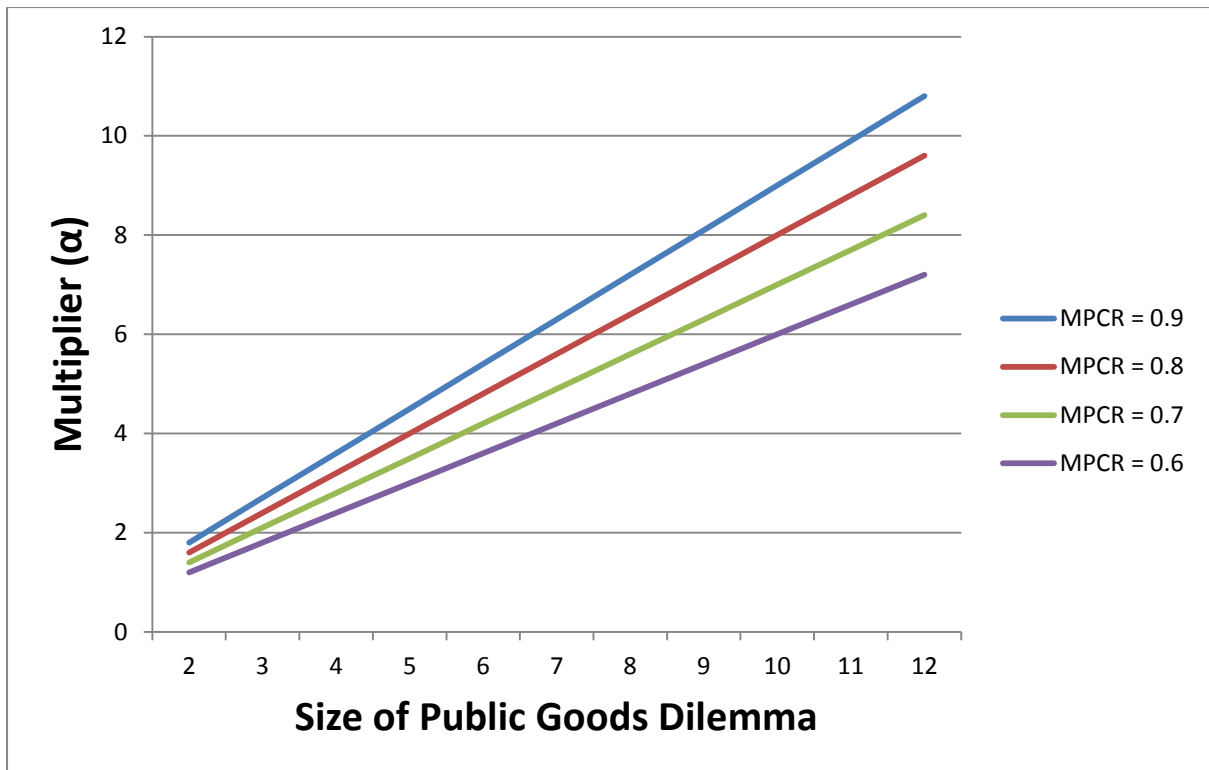

**S2 Figure.** Multiplier values by different sizes of public goods dilemma and different Marginal Per Capita Return values. MPCR values are always between 0 and 1, but for a 2-person public goods dilemma, the MPCR must remain about .5, so we have shown four values to cover the range of .5 to 1.
