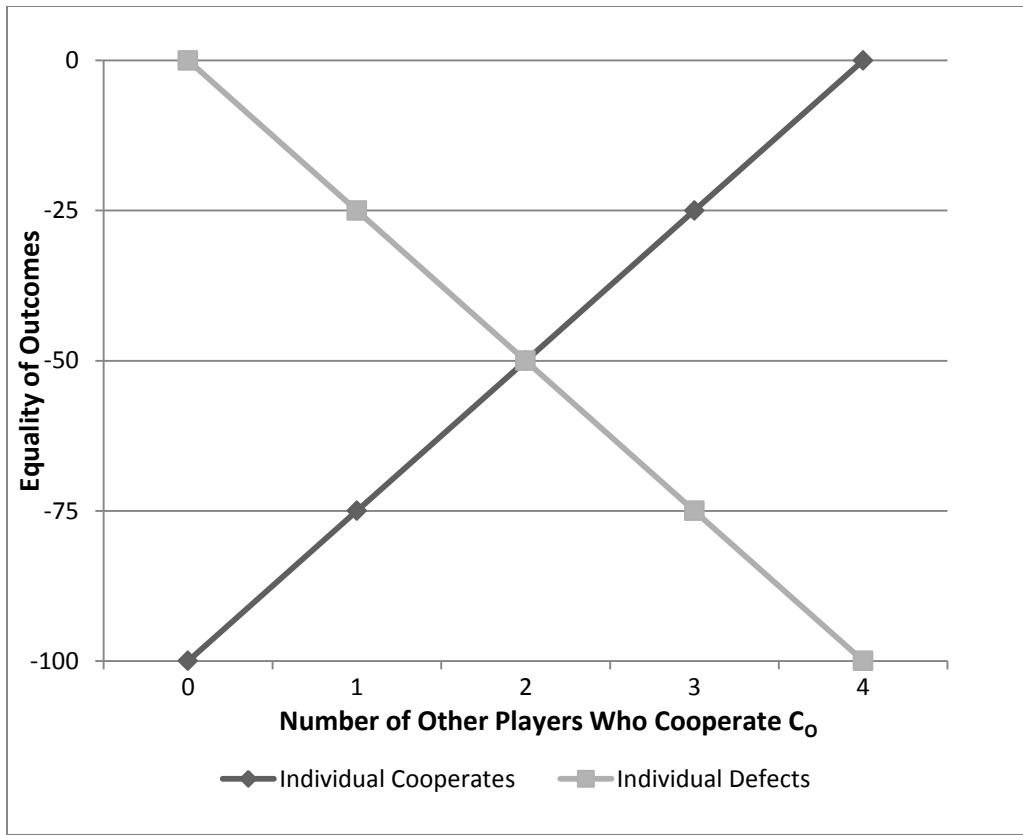

**S3 Figure.** *Equality of Outcomes* equation,  $- \left| z(1 - c_s - \frac{n-1-c_o}{n-1}) \right|$ , for  $n = 5$ ,  $z = 100$ , for varying if the individual cooperates,  $c_s$ , and how many other players cooperate,  $c_o$ . Note that complete equality is 0.
