### S1 File: Missing Responses

Participants that missed 3 or more selections were timed out of the program and their entire group was excluded from our dataset. Of those included, 15 of the 390 participants (3.8%) missed a total of 21 rounds (0.2% of total rounds). By condition, they are listed as the first values in Table A. Additionally 9 participants missed the first round and 3 of those same participants also missed the second round, suggesting that they were not paying attention when the rounds began. The waiting room gave a countdown timer until they would definitely be assigned to a group, yet they could easily be assigned to a group prior to the timer expiring. Also participants were given twice as much time in the first and second round compared to other rounds. The numbers in brackets in Table A are the missed rounds 3-31 by condition. There was only one case in which multiple participants in the same group missed rounds, but it was both participants missing the first round.

**Table A.** Computer responses within the experiment.

|               | 2-Person | 5-Person            |               |
|---------------|----------|---------------------|---------------|
|               |          | Multiplier Constant | MPCR Constant |
| Lower Values  | 2 [0]    | 2 [1]               | 5 [2]         |
| Higher Values | 8 [2]    | 4 [4]               | 0 [0]         |

Note: Computer responses in rounds 3-31 only in brackets
