# Supplementary material for: Dilemma of Dilemmas: How Collective and Individual Perspectives Can Clarify the Size Dilemma in Voluntary Linear Public Goods Dilemmas
Source: PLOS journal article supplement (doi:10.1371/journal.pone.0120379), 2015-03-23
Supplement: S7 (10.1371/journal.pone.0120379.s007) [file journal.pone.0120379.s007]

**S1 Table**

Robustness checks for the simulated results: the models that best match the empirical result pattern

|                                                 | 2-Person    |              | 5-Person            |              |               |              | Weights        |                |                |
|-------------------------------------------------|-------------|--------------|---------------------|--------------|---------------|--------------|----------------|----------------|----------------|
|                                                 | Low Benefit | High Benefit | Multiplier Constant |              | MPCR Constant |              | W <sub>1</sub> | W <sub>2</sub> | W <sub>3</sub> |
|                                                 |             |              | Low Benefit         | High Benefit | Low Benefit   | High Benefit |                |                |                |
| Empirical Results                               | .354        | .629         | .162                | .237         | .602          | .611         |                |                |                |
| Simulated Results                               |             |              |                     |              |               |              |                |                |                |
| With initial parameters                         | .248        | .616         | .089                | .308         | .618          | .644         | .2             | .5             | .3             |
| With no defectors                               | .497        | .936         | .176                | .801         | .932          | .936         | .2             | .5             | .3             |
| With random utility term per round <sup>a</sup> | .349        | .613         | .090                | .176         | .596          | .635         | .2             | .5             | .3             |
| With random utility term per round <sup>a</sup> | .255        | .466         | .217                | .290         | .592          | .645         | .1             | .5             | .4             |
| With random utility term per round <sup>a</sup> | .459        | .657         | .390                | .502         | .628          | .631         | 0              | .6             | .4             |
| With random utility term per round <sup>a</sup> | .561        | .627         | .288                | .456         | .632          | .632         | .1             | .6             | .3             |
| With random weights term per person             | .259        | .634         | .079                | .295         | .616          | .634         | .2             | .5             | .3             |
| With temporal memory ( $W_M=.8$ )               | .415        | .640         | .088                | .220         | .621          | .644         | .2             | .5             | .3             |

<sup>a</sup> There were four weights that matched the empirical pattern, however  $W_1=.2$ ,  $W_2=.5$ ,  $W_3=.3$  was the best match.
